# Supplementary material for: Machine Learning-Based Cardiovascular Disease Prediction: Comparative Analysis of SMOTE Impact on Imbalanced Healthcare Data
Source: Research Square preprint supplement (doi:10.21203/rs.3.rs-7428299/v1), 2025-08-27
Supplement: Supplementary file 1 [file 7af85023606a14f8f2a87887.docx]

**Tables:**

**Table 1: Description of the dataset features**

| **Feature** | **Explanation** |
| --- | --- |
| Age_Category | Age in complete years from 18 to 80+ |
| General_Health | Poor, Very Good, Fair, Good, Excellent |
| Exercise | Yes or No (Yes =1, No=0) |
| Skin_Cancer | Yes or No (Yes =1, No=0) |
| Other_Cancer | Yes or No (Yes =1, No=0) |
| Depression | Yes or No (Yes =1, No=0) |
| Arthritis | Yes or No (Yes =1, No=0) |
| Sex | Female or Male (Female=0, Male=1) |
| Height_(cm) | Height in Centimeter |
| Weight_(kg) | Weight in Kilo gram |
| BMI | Body Mass index floating value |
| Smoking_History | Yes or No (Yes =1, No=0) |
| Alcohol_Consumption | Alcohol consumption in milliliter |
| Green_Vegetables_Consumption | Green vegetables in Gram |
| Fruit_Consumption | Fruits in Gram |
| Diabetes | No = 0, No, pre-diabetes or borderline diabetes = 1,  Yes = 2, Yes, but female told only during pregnancy = 3 |
| Cardio_Disease | Yes or No (Yes =1, No=0) |

**Table 2: Parameters used for each model in the Without SMOTE and With SMOTE method**

| **Models** | **Parameters** |
| --- | --- |
| Random Forest | 'n_estimators': [400,500,600], 'min_samples_split': randint(2, 20),  'min_samples_leaf': randint(1, 20),  'max_features': ['auto', 'sqrt'], 'bootstrap': [True, False] |
| Support Vector Machine | 'C': [0.1, 1, 10, 100], 'gamma': [1, 0.1, 0.01, 0.001], 'kernel': ['rbf', 'poly', 'sigmoid'] |
| Gaussian Naive Bayes | 'priors': [None, [0.3, 0.7], [0.6, 0.4]], 'var_smoothing': [1e-9, 1e-8, 1e-7, 1e-6, 1e-5] |
| Logistic Regression | 'C': [0.001, 0.01, 0.1, 1, 10, 100], 'penalty': [None, 'l1', 'l2', 'elasticnet'], ‘solver': ['newton-cg', 'lbfgs', 'liblinear', 'sag', 'saga'], 'max_iter': [100, 200, 300], 'multi_class': ['auto', 'ovr', 'multinomial'], 'class_weight': ['balanced', None], 'warm_start': [True, False] |
| Decision Tree | 'criterion': ['gini', 'entropy'], 'splitter': ['best', 'random'], 'max_depth': [None, 10, 20, 30], 'max_features': ['auto', 'sqrt', 'log2'], 'min_samples_split': [2, 5, 6, 10], 'min_samples_leaf': [1, 2, 4], 'class_weight': ['balanced', None] |
| Adaboosting | 'n_estimators': [50, 100, 200], 'learning_rate': [0.01, 0.1, 1.0], 'algorithm': ['SAMME', 'SAMME.R'], 'random_state' : [42] |
| K-Nearest Neighbor | 'n_neighbors': [3, 5, 7, 9], 'weights': ['uniform', 'distance'], 'metric': ['euclidean', 'manhattan', 'minkowski','Hamming'] |
| XGBoost | 'n_estimators': [100, 200, 300], 'learning_rate': [0.01, 0.05, 0.1, 0.2], 'max_depth': [3, 4, 5, 6], 'min_child_weight': [1, 2, 3], 'subsample': [0.8, 0.9, 1.0], 'colsample_bytree': [0.7, 0.8, 0.9] |
| Gradient Boosting | 'n_estimators': [100, 200, 300, 400, 500], 'learning_rate': [0.01, 0.05, 0.1, 0.2, 0.3], 'max_depth': randint(3, 10), 'min_samples_split': randint(2, 20), 'min_samples_leaf': randint(1, 20), 'subsample': [0.8, 0.9, 1.0], 'max_features': ['auto', 'sqrt', None] |

**Table 3: Optimal Hyperparameters with and without SMOTE of each Model**

| **Model** | **Optimal Hyperparameters (Without SMOTE)** | **Optimal Hyperparameters (With SMOTE)** |
| --- | --- | --- |
| Random Forest | 'bootstrap':True,'max_features': 'sqrt', 'min_samples_leaf': 12, 'min_samples_split':8, 'n_estimators': 500 | 'bootstrap':False,'max_features': 'sqrt', 'min_samples_leaf': 3, 'min_samples_split':6,'n_estimators': 600 |
| Support Vector Machine | 'kernel': 'sigmoid', 'gamma': 0.1, 'C': 0.1 | 'kernel': 'rbf', 'gamma': 0.1, 'C': 10 |
| Gaussian Naive Bayes | 'var_smoothing': 1e-05, 'priors': None | 'var_smoothing':1e-05,'priors': None |
| Logistic Regression | 'warm_start': False, 'solver': 'lbfgs', 'penalty': None, 'multi_class': 'ovr', 'max_iter': 200, 'class_weight': None, 'C': 1 | 'warm_start': False, 'solver': 'lbfgs', 'penalty': None, 'multi_class': 'multinomial', 'max_iter': 300, 'class_weight': 'balanced', 'C': 1 |
| Decision Tree | 'splitter':'random','min_samples_split': 2,'min_samples_leaf':2,'max_features': 'log2', 'max_depth': 10, 'criterion': 'entropy', 'class_weight': None | 'splitter': 'best', 'min_samples_split': 6, 'min_samples_leaf': 1, 'max_features': 'sqrt', 'max_depth': 30, 'criterion': 'entropy', 'class_weight': 'balanced' |
| Adaboosting | 'random_state':42,'n_estimators': 50,'learning_rate':0.01,'algorithm': 'SAMME' | 'random_state': 42, 'n_estimators': 200, 'learning_rate': 1.0, 'algorithm': 'SAMME' |
| K-Nearest Neighbor | 'weights': 'uniform', 'n_neighbors': 9, 'metric': 'manhattan' | 'weights': 'uniform', 'n_neighbors': 3, 'metric': 'manhattan' |
| XGBoost | 'subsample': 0.8, 'n_estimators': 100, 'min_child_weight': 2, 'max_depth': 6, 'learning_rate':0.05,'colsample_bytree': 0.7 | 'subsample': 0.8, 'n_estimators': 300, 'min_child_weight': 1, 'max_depth': 6, 'learning_rate': 0.2, 'colsample_bytree': 0.8 |
| Gradient Boosting | 'learning_rate': 0.01, 'max_depth': 6, 'max_features':None,'min_samples_leaf': 1, 'min_samples_split': 6, 'n_estimators': 400, 'subsample': 0.8 | 'learning_rate': 0.2, 'max_depth': 9, 'max_features':None,'min_samples_leaf': 17, 'min_samples_split': 7, 'n_estimators': 500, 'subsample': 0.9 |

**Table 4: Performance Metrics of Models Without SMOTE**

| **Model Name** | **Accuracy**  **(%)** | **Precision** | | **Recall** | | **F1-Score** | |
| --- | --- | --- | --- | --- | --- | --- | --- |
| **0** | **1** | **0** | **1** | **0** | **1** |
| Random Forest | 92.03 | 0.92 | 0.56 | 1.00 | 0.02 | 0.96 | 0.04 |
| Support Vector Machine | 91.99 | 0.92 | 0.00 | 1.00 | 0.00 | 0.96 | 0.00 |
| Gaussian Naive Bayes | 85.19 | 0.94 | 0.23 | 0.89 | 0.36 | 0.92 | 0.28 |
| Logistic Regression | 91.99 | 0.92 | 0.00 | 1.00 | 0.00 | 0.96 | 0.00 |
| Decision Tree | 91.94 | 0.92 | 0.39 | 1.00 | 0.01 | 0.96 | 0.02 |
| Adaboosting | 91.99 | 0.92 | 0.00 | 1.00 | 0.00 | 0.96 | 0.00 |
| K-Nearest Neighbor | 91.85 | 0.92 | 0.32 | 1.00 | 0.02 | 0.96 | 0.03 |
| XGBoost | 92.04 | 0.92 | 0.55 | 1.00 | 0.03 | 0.96 | 0.05 |
| Gradient Boosting | 92.01 | 0.92 | 0.52 | 1.00 | 0.03 | 0.96 | 0.05 |
| Stacking | 91.86 | 0.93 | 0.46 | 0.99 | 0.10 | 0.96 | 0.16 |

**Table 5: Performance Metrics of Models With SMOTE**

| **Model Name** | **Accuracy**  **(%)** | **Precision** | | **Recall** | | **F1-Score** | |
| --- | --- | --- | --- | --- | --- | --- | --- |
| **0** | **1** | **0** | **1** | **0** | **1** |
| Random Forest | 89.50 | 0.91 | 0.88 | 0.90 | 0.88 | 0.91 | 0.88 |
| Support Vector Machine | 59.30 | 0.58 | 0.82 | 0.98 | 0.11 | 0.73 | 0.19 |
| Gaussian Naive Bayes | 75.21 | 0.79 | 0.71 | 0.75 | 0.75 | 0.77 | 0.73 |
| Logistic Regression | 74.24 | 0.79 | 0.69 | 0.72 | 0.77 | 0.76 | 0.73 |
| Decision Tree | 83.59 | 0.88 | 0.79 | 0.82 | 0.86 | 0.85 | 0.82 |
| Adaboosting | 80.49 | 0.83 | 0.78 | 0.82 | 0.79 | 0.82 | 0.78 |
| K-Nearest Neighbor | 89.38 | 0.99 | 0.81 | 0.82 | 0.99 | 0.90 | 0.89 |
| XGBoost | 88.00 | 0.89 | 0.87 | 0.90 | 0.95 | 0.89 | 0.86 |
| Gradient Boosting | 93.23 | 0.92 | 0.94 | 0.96 | 0.90 | 0.94 | 0.92 |
| Stacking | 94.49 | 0.96 | 0.93 | 0.94 | 0.95 | 0.95 | 0.94 |

**Table 6: Execution Time Comparison of Machine Learning Models**

| **Model Name** | **Without SMOTE (sec)** | **With SMOTE (sec)** |
| --- | --- | --- |
| Random Forest | 767.63 | 1650.69 |
| Support Vector Machine | 3035.50 | 6455.76 |
| Gaussian Naive Bayes | 6.78 | 10.31 |
| Logistic Regression | 1088.55 | 2336.80 |
| Decision Tree | 45.15 | 98.28 |
| Adaboosting | 464.39 | 1022.00 |
| K-Nearest Neighbor | 606.35 | 1588.47 |
| XGBoost | 210.78 | 347.63 |
| Gradient Boosting | 2348.31 | 23485.31 |
| Stacking | 175.85 | 1127.75 |
